# Supplementary material for: Electrochemical properties of anthraquinone-containing polymer nanocomposite by nano-level molecular ordering
Source: Royal Society of Chemistry journal article supplement (doi:10.1039/d1py01011e), 2021-01-01
Supplement: d1py01011e1.pdf [file d1py01011e1.pdf]

## **Electrochemical property of anthraquinone-containing polymer nanocomposite by nano-level molecular ordering**

Wonbin Kim<sup>†a</sup>, Zubair Ahmad<sup>†b</sup>, Hong-Joon Lee<sup>a</sup>, Seung Jo Yoo<sup>b</sup> Jae-Jin Shim<sup>b\*</sup> and Jae-Suk Lee<sup>a\*</sup>

<sup>a</sup>School of Materials Science and Engineering, Gwangju Institute of Science and Technology (GIST), 123 Cheomdangwagi-ro, Buk-gu, Gwangju 61005, Republic of Korea.

<sup>b</sup>School of Chemical Engineering, Yeungnam University, Gyeongsan 38541, Korea.

<sup>c</sup>Center of Research Equipment, Korea Basic Science Institute (KBSI), 169-148 Gwahak-ro, Yuseong-gu, Daejeon 34133, Republic of Korea.

Phone: + 82 62 715 2306

E-mail: jslee@gist.ac.kr

<sup>†</sup>These authors contributed equally to this work.

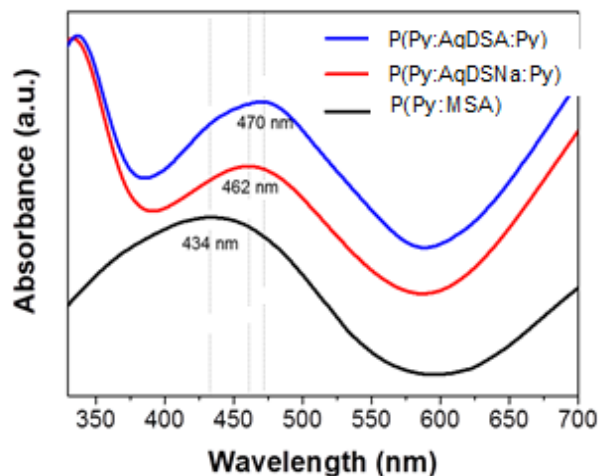

**Fig. S1 UV-Vis spectra of PPy-based polymer films.** The polymer films were *in situ* coated on the glass substrates during polymerization. The absorption spectra at around 450 nm indicates the existence of p-doped PPy structures. All spectra exhibited absorption peaks at around 450 nm due to a polaron band of p-doped PPy structure.<sup>1</sup> P(Py:AqDSA:Py) showed also the absorption peak of anthraquinone moiety at approximately 340 nm.<sup>2</sup> It proves the coexistence of PPy and AqDSA structures together. The P(Py:AqDSA:Py) is confirmed the redshifted absorption spectra compared with that of P(Py:MSA) because of an electronic interaction between the regularly stacked polymer chains with aromatic anthraquinone compounds.

- (1) Ullah, H., Shah, A.-H. A., Bilal, S. & Ayub, K. *J. Phys. Chem. C*, 2014, **118**, 17819–17830.
- (2) Jacobsen, M. F., Ferapontova, E. E. & Gothelf, K. V. *Org. Biomol. Chem.* 2009, **7**, 905–908.

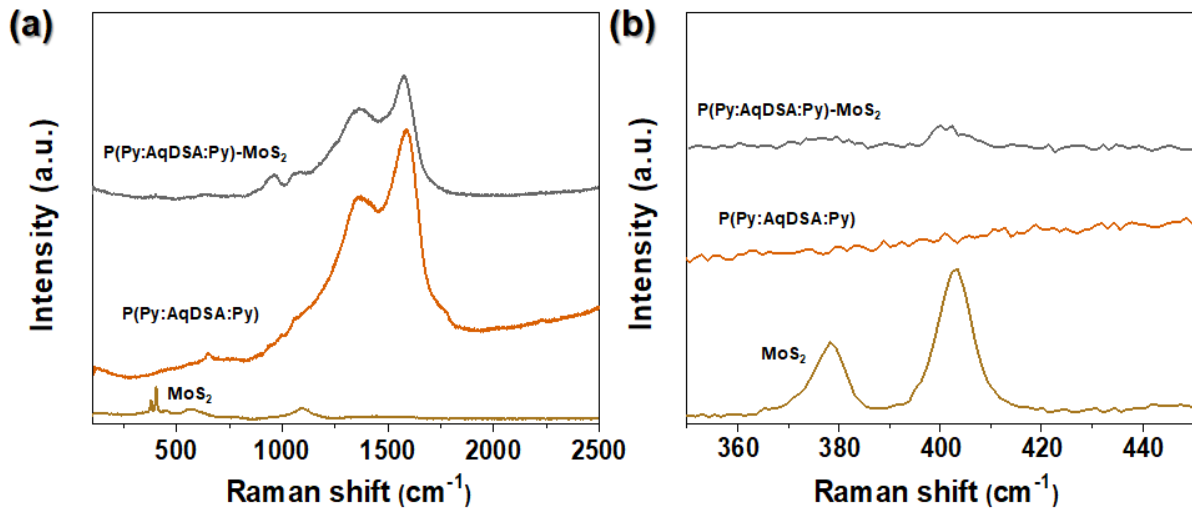

**Fig. S2** Raman spectroscopy of composite, P(Py:AqDSA:Py)-MoS<sub>2</sub>, P(Py:AqDSA:Py) and MoS<sub>2</sub> range (a) from 350 to 2500 cm<sup>-1</sup> and (b) from 350 to 450 cm<sup>-1</sup>.

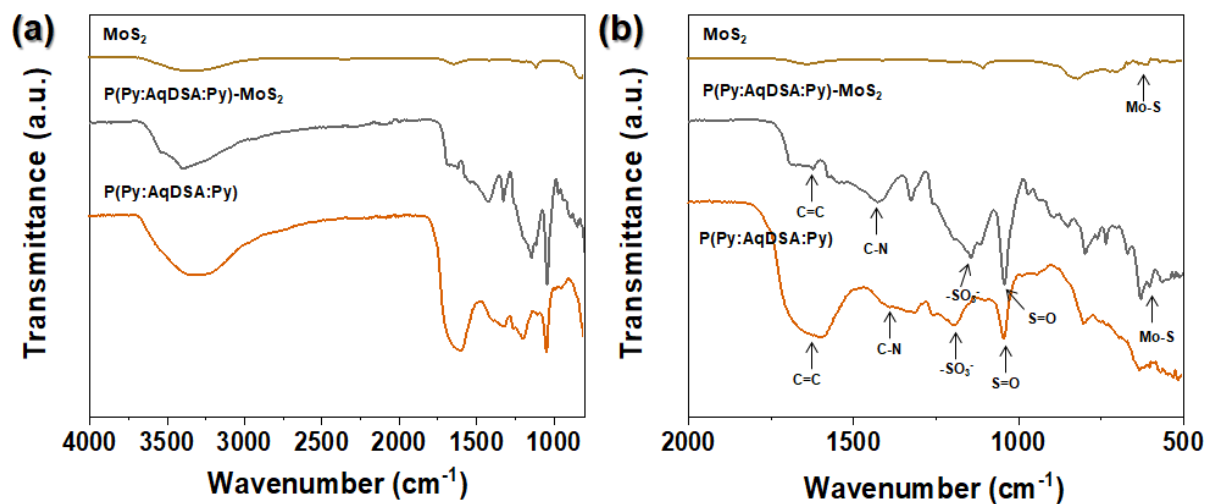

**Fig. S3** FT-IR spectroscopy of composites,  $\text{P(Py:AqDSA:Py)-MoS}_2$ ,  $\text{P(Py:AqDSA:Py)}$  and  $\text{MoS}_2$  range (a) from 750 to 4000  $\text{cm}^{-1}$  and (b) from 500 to 2000  $\text{cm}^{-1}$ .

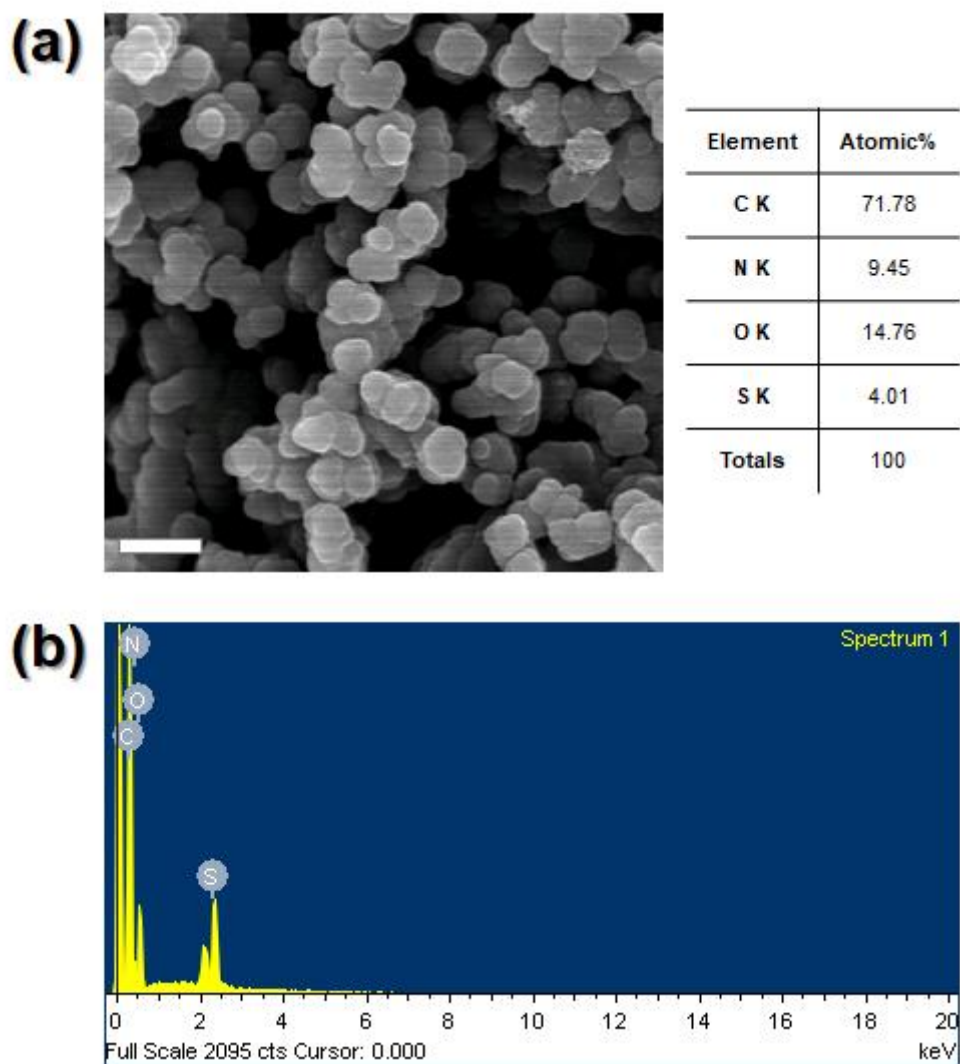

**Fig. S4** (a) SEM image, scale bar, 1  $\mu\text{m}$ , and (b) EDS of P(Py:AqDSA:Py).

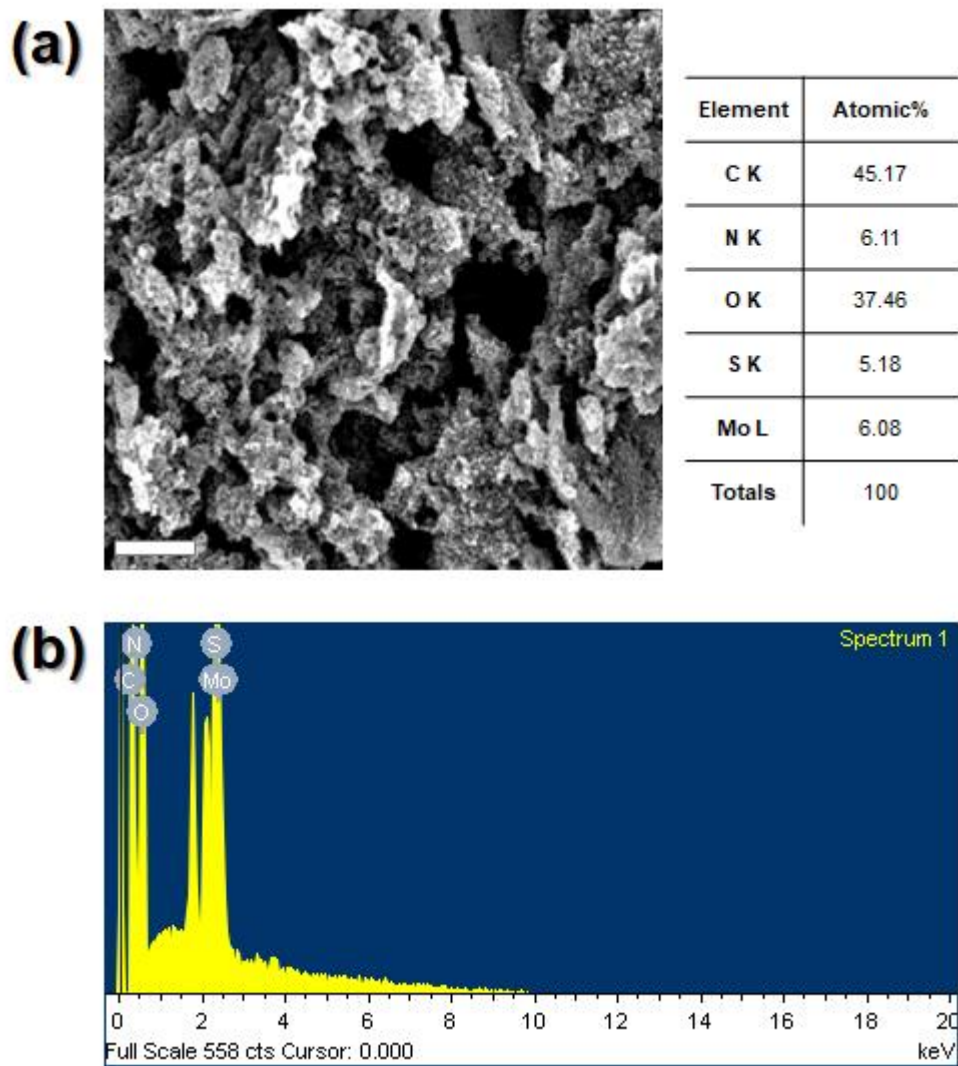

**Fig. S5** (a) SEM image, scale bar, 1  $\mu\text{m}$ , and (b) EDS of P(Py:AqDSA:Py)-MoS<sub>2</sub>.

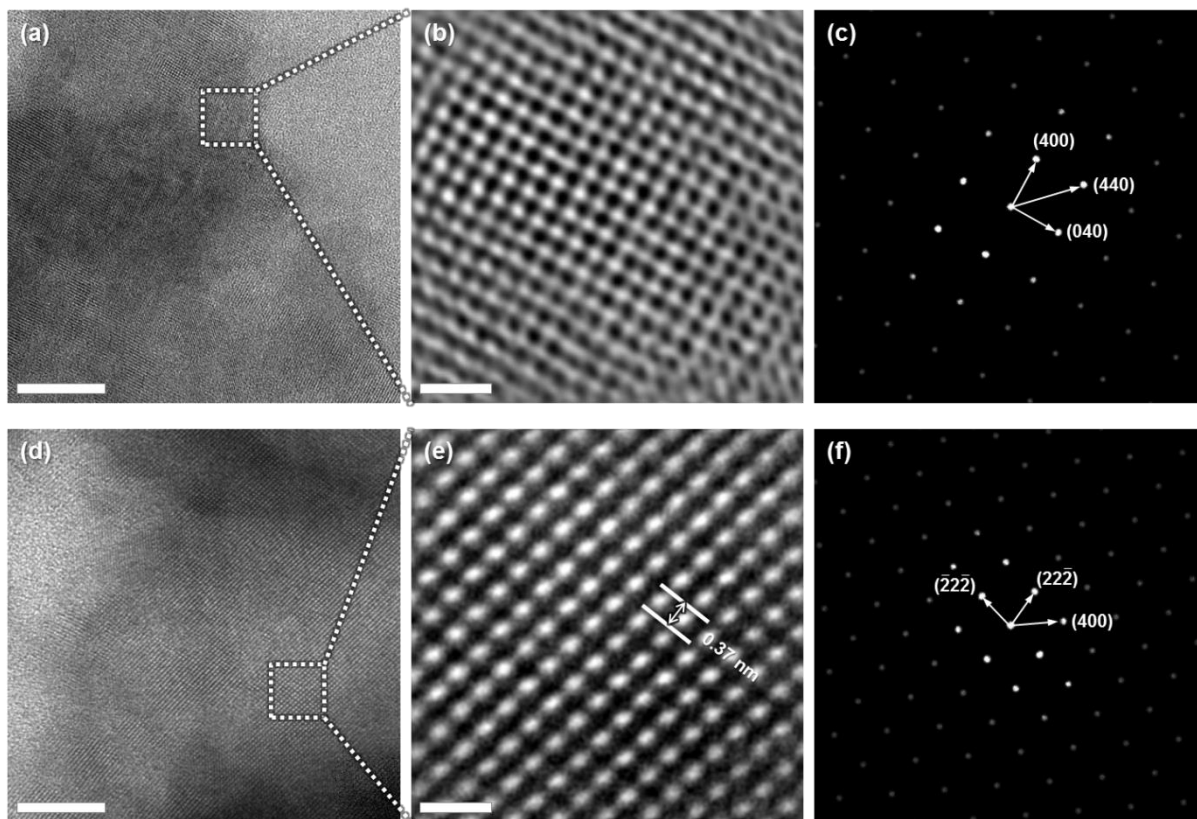

**Fig. S6** Crystal morphology of nano level ordered P(Py:AqDSA:Py). HRTEM and processed FFT images observed. (a), (b), (c) [001] and (d), (e), (f) [011] Scale bar, (a), (d) 5 nm and (b), (e) 1 nm. The lattices and their FFT pattern images correspond to the FCC structure.

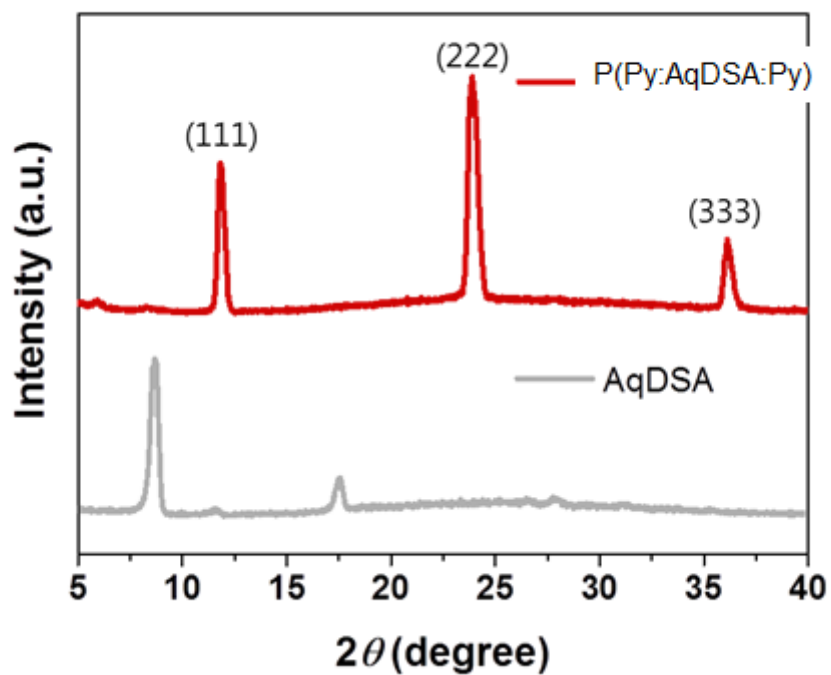

**Fig. S7** XRD spectra of AqDSA and P(Py:AqDSA:Py) films. The observed peaks were correlated to the measured  $d$  spacings in [111] direction by HRTEM measurement, which is correlated with the growth direction of polymer backbones.



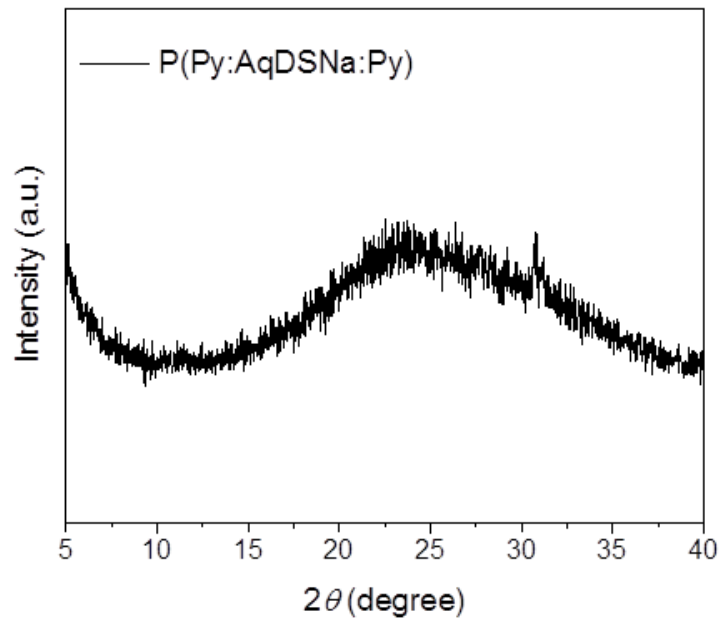

**Fig. S8** XRD spectrum of P(Py:AqDSNa:Py) film. The spectrum indicates demonstrated amorphous natures.

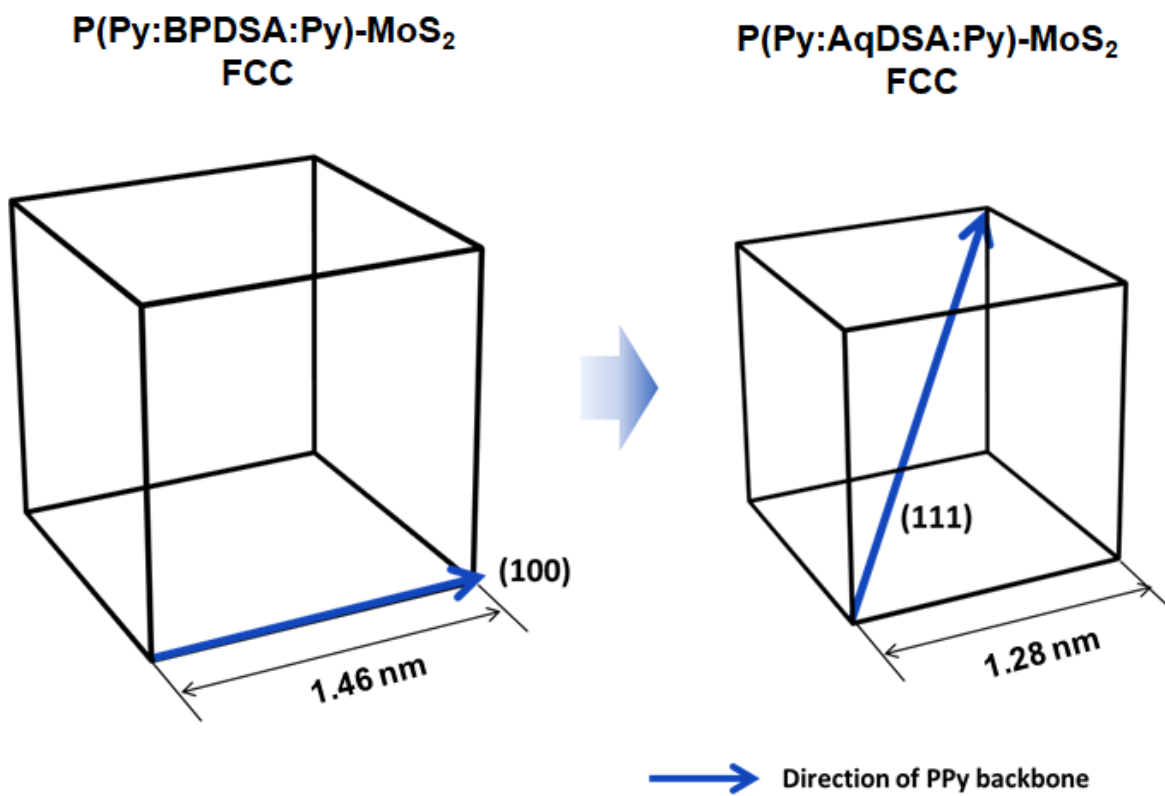

**Fig. S9** A unit cell of FCC structure with different lattice parameters.

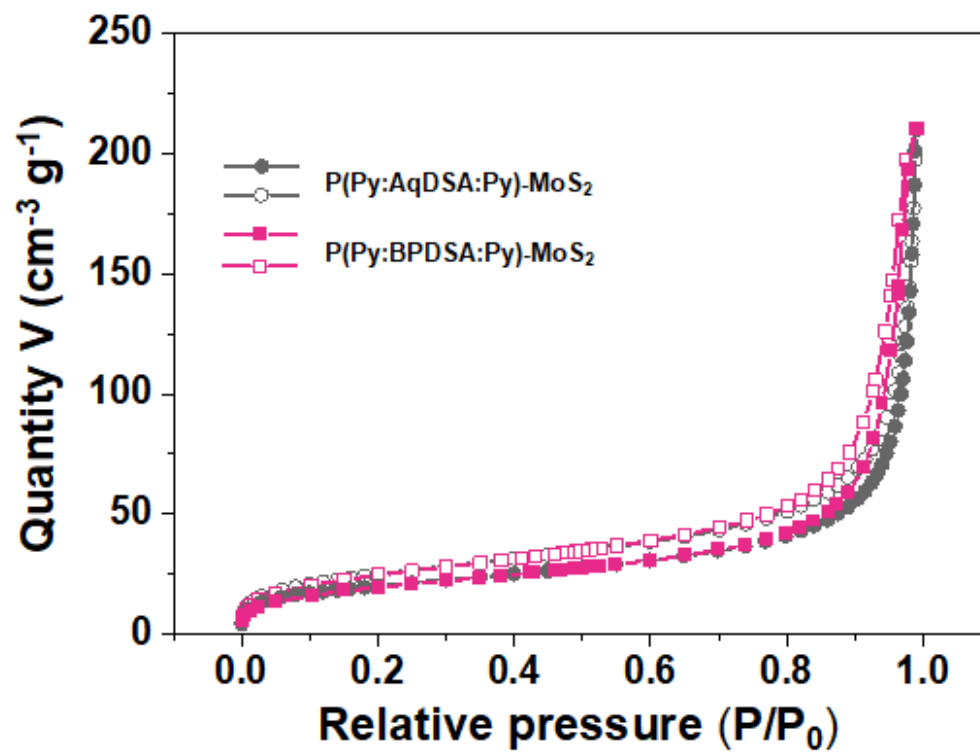

**Fig. S10** N<sub>2</sub> adsorption/desorption isotherms of P(Py:AqDSA:Py)-MoS<sub>2</sub> and P(Py:BPDSA:Py)-MoS<sub>2</sub>.

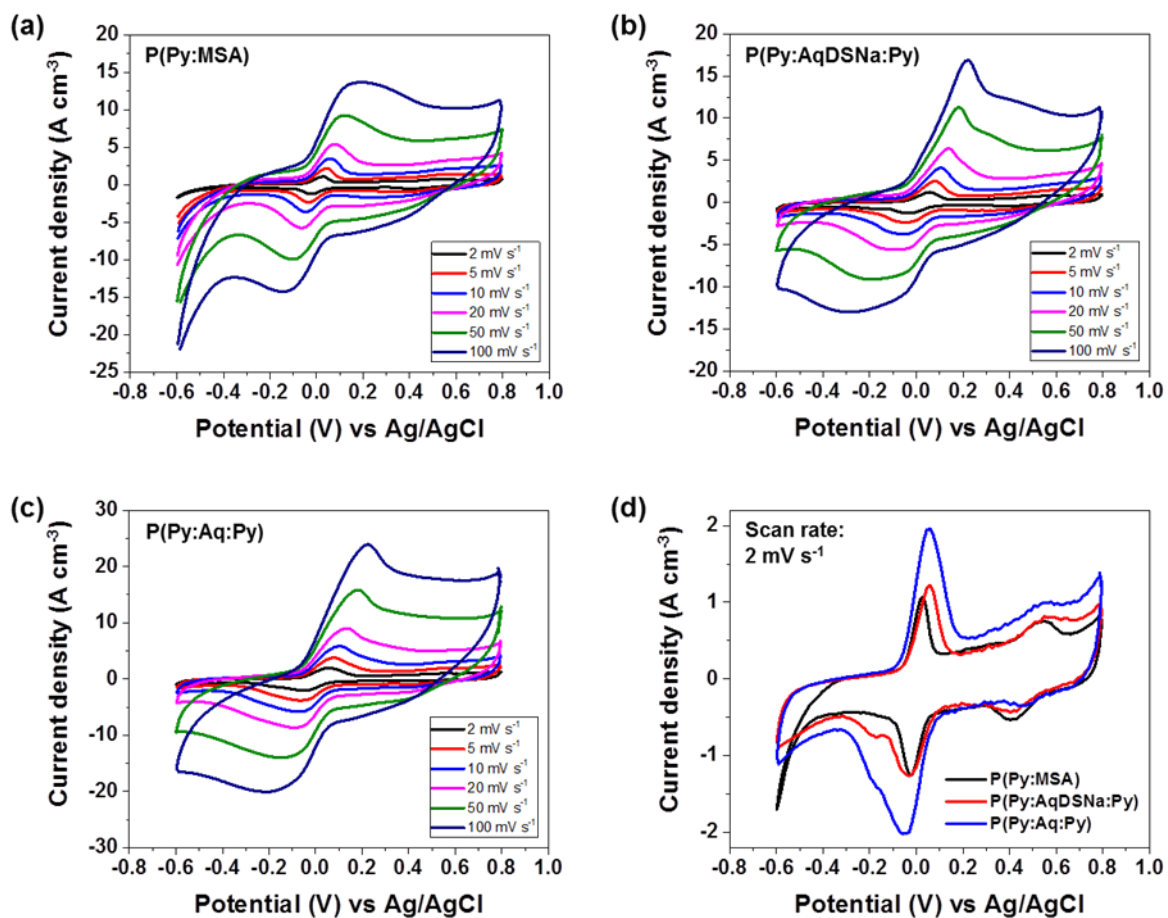

**Fig. S11** Electrochemical performance of *in situ* polymerized films. CV curves of (a) P(Py:MSA), (b) P(Py:AqDSNa:Py) and (c) P(Py:AqDSA:Py) at various scan rates. (d) CV curves of the polymer films at scan rate of 2 mV s<sup>-1</sup>.

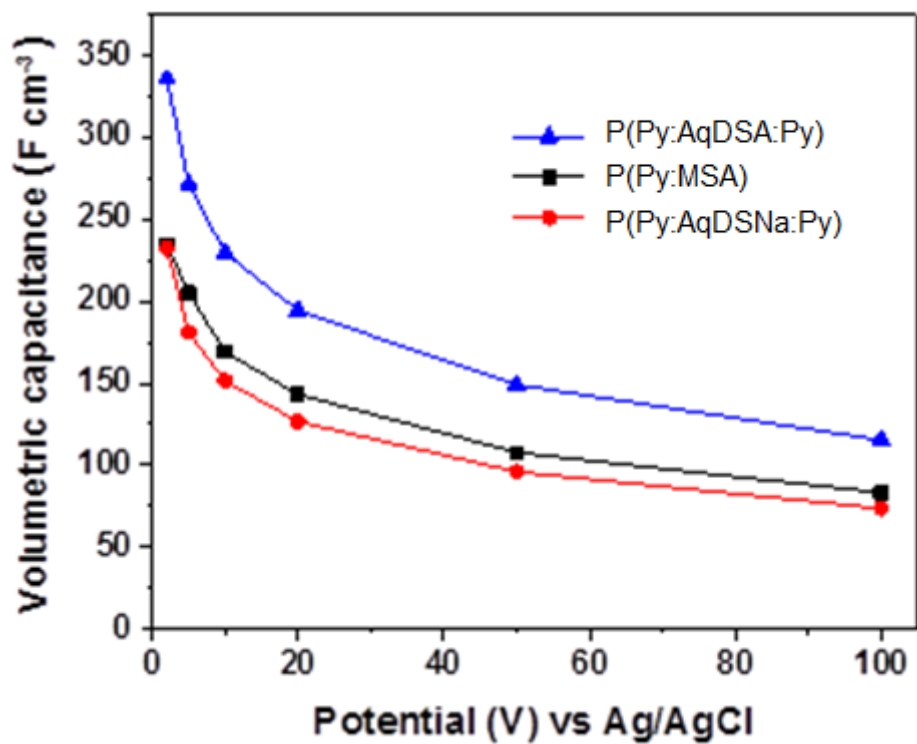

**Fig. S12** Volumetric capacitances of P(Py:MSA), P(Py:AqDSNa:Py) and P(Py:AqDSA:Py) at various scan rates.

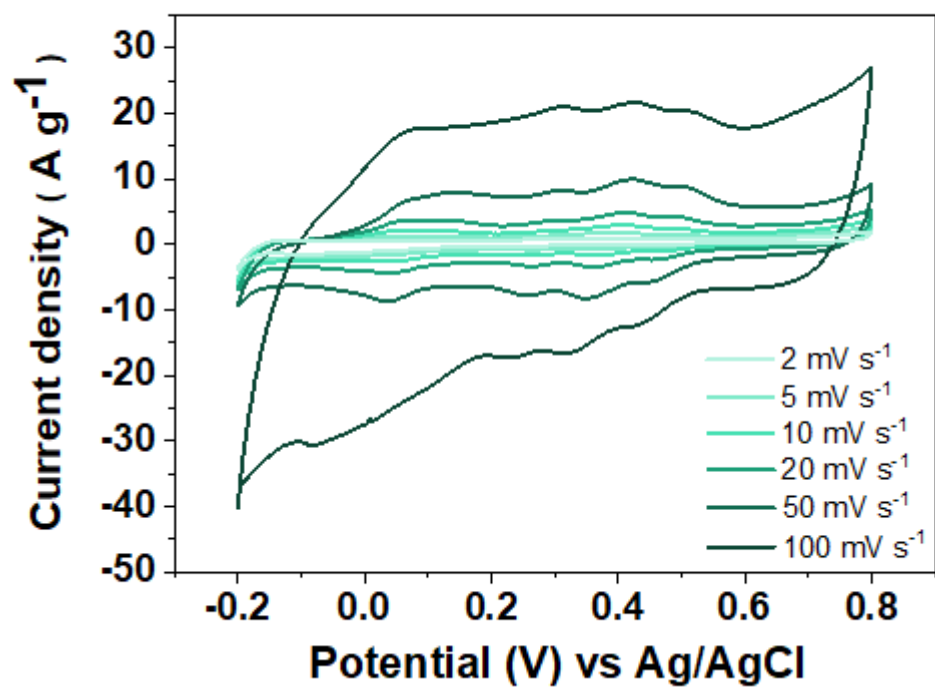

Fig. S13 CV curves of P(Py:MSA)-MoS<sub>2</sub> at various scan rates.

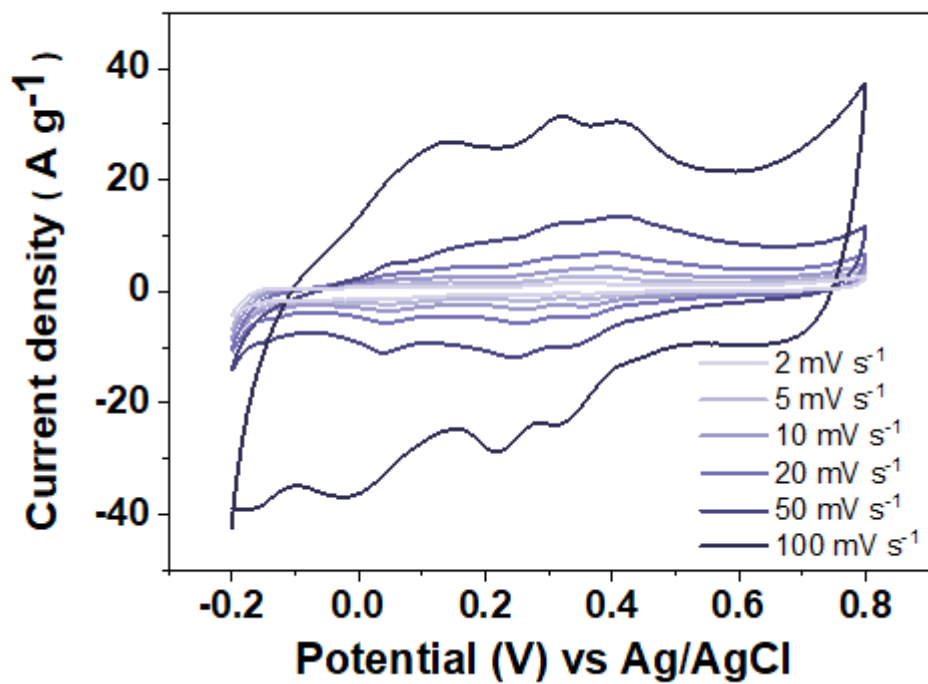

Fig. S14 CV curves of PPy-MoS<sub>2</sub> at various scan rates.
